# Supplementary material for: Transcriptomic and metabolomic profiling of drought-tolerant and susceptible sesame genotypes in response to drought stress
Source: BMC Plant Biol. 2019 Jun 20;19:267. doi: 10.1186/s12870-019-1880-1 (PMC6585049; doi:10.1186/s12870-019-1880-1)
Supplement: Supplementary file 2 — Table S1. Statistical analyses and mapping results of RNA sequencing reads. (XLSX 12 kb) [file 12870_2019_1880_MOESM2_ESM.xlsx]

## Sheet: Sheet1
Table S1. Statistical analyses and mapping results of RNA sequencing reads
Samples	Clean reads	Clean bases	GC Content	%≥Q30	Mapped Reads	Uniq Mapped Reads
DT_T0_1	26340460	7193468094	0.4699	0.9608	0.835	0.7974
DT_T0_2	22303194	6185803082	0.4691	0.9615	0.8497	0.8289
DT_T0_3	20875736	5781301863	0.4676	0.962	0.8491	0.8247
DT_T1_1	24167935	6684029787	0.4612	0.9626	0.8377	0.8174
DT_T1_2	20685130	5701275485	0.4654	0.9622	0.849	0.8016
DT_T1_3	21169098	5840793284	0.4611	0.9624	0.842	0.8241
DT_T2_1	20707839	5688637966	0.4638	0.9631	0.8367	0.818
DT_T2_2	23655734	6522620651	0.4624	0.9618	0.8417	0.8202
DT_T2_3	24651596	6751018597	0.4639	0.9611	0.833	0.8114
DT_T3_1	21745716	5851677830	0.4621	0.963	0.8429	0.8264
DT_T3_2	23151152	6372620852	0.4604	0.9619	0.8327	0.8163
DT_T3_3	22047366	6072438050	0.459	0.9609	0.843	0.827
DT_T4_1	13574744	3671382437	0.4592	0.9556	0.8166	0.7923
DT_T4_2	15530039	4210759441	0.4578	0.9548	0.8237	0.8074
DT_T4_3	14201451	3873115558	0.4619	0.9541	0.823	0.7943
DS_T0_1	23594660	6516480288	0.472	0.9621	0.855	0.8287
DS_T0_2	26016259	7189981113	0.4742	0.9617	0.855	0.8306
DS_T0_3	23971403	6621596431	0.4734	0.9615	0.8533	0.826
DS_T1_1	23098766	6379513834	0.4658	0.9594	0.8461	0.8284
DS_T1_2	26199406	7276956355	0.4656	0.9592	0.8484	0.8273
DS_T1_3	24188440	6685747569	0.465	0.9611	0.8537	0.8345
DS_T2_1	15571621	4242397996	0.4616	0.9518	0.8316	0.8161
DS_T2_2	17533447	4798098911	0.464	0.9523	0.8346	0.8177
DS_T2_3	15057596	4082533284	0.4633	0.9541	0.8275	0.8085
DS_T3_1	15916386	4379426132	0.4635	0.9523	0.8309	0.8157
DS_T3_2	13443388	3694729455	0.462	0.9523	0.8296	0.8149
DS_T3_3	15159102	4142636229	0.4604	0.954	0.8288	0.8124
DS_T4_1	24587880	6733780033	0.4614	0.963	0.8365	0.8202
DS_T4_2	23824364	6557472441	0.4612	0.9638	0.8451	0.8292
DS_T4_3	23089313	6346511675	0.4606	0.9624	0.8406	0.8232
